# Supplementary material
Source: PubMed Central journal article supplement (PMC10112494)
Supplement: NIHMS1879275-supplement-Supplementary.pdf [file NIHMS1879275-supplement-Supplementary.pdf]

# Weakly Semi-supervised Phenotyping Using Electronic Health Records

Isabelle-Emmanuella Nogues<sup>1</sup>, Jun Wen<sup>2</sup>, Yucong Lin<sup>2,3</sup>, Molei Liu<sup>1</sup>, Sara K. Tedeschi<sup>4</sup>, Alon Geva<sup>2,5,6</sup>, Tianxi Cai<sup>1,2\*</sup>, Chuan Hong<sup>2\*</sup>

*<sup>1</sup>Department of Biostatistics, Harvard T. H. Chan School of Public Health, Boston, MA, USA;*

*<sup>2</sup>Department of Biomedical Informatics, Harvard Medical School, Boston, MA, USA;*

*<sup>3</sup>Center for Statistical Science, Tsinghua University, Beijing, China;*

*<sup>4</sup>Department of Medicine, Division of Rheumatology, Inflammation and Immunity, Brigham and Women's Hospital, Boston, MA, USA;*

*<sup>5</sup>Department of Anesthesiology, Critical Care, and Pain Medicine, and Computational Health Informatics Program, Boston Children's Hospital, Boston, MA, USA;*

*<sup>6</sup>Department of Anesthesia, Harvard Medical School, Boston, MA, USA.*

\* Cai and Hong contributed equally.

## **1 Cross-validation**

We perform all experiments with results averaged across 100 bootstrap replications of the labeled data, in order to correct for potential randomness in sampling of the labeled observations. Within each bootstrap replication, we apply 5-fold cross-validation.

## 2 Additional Figures

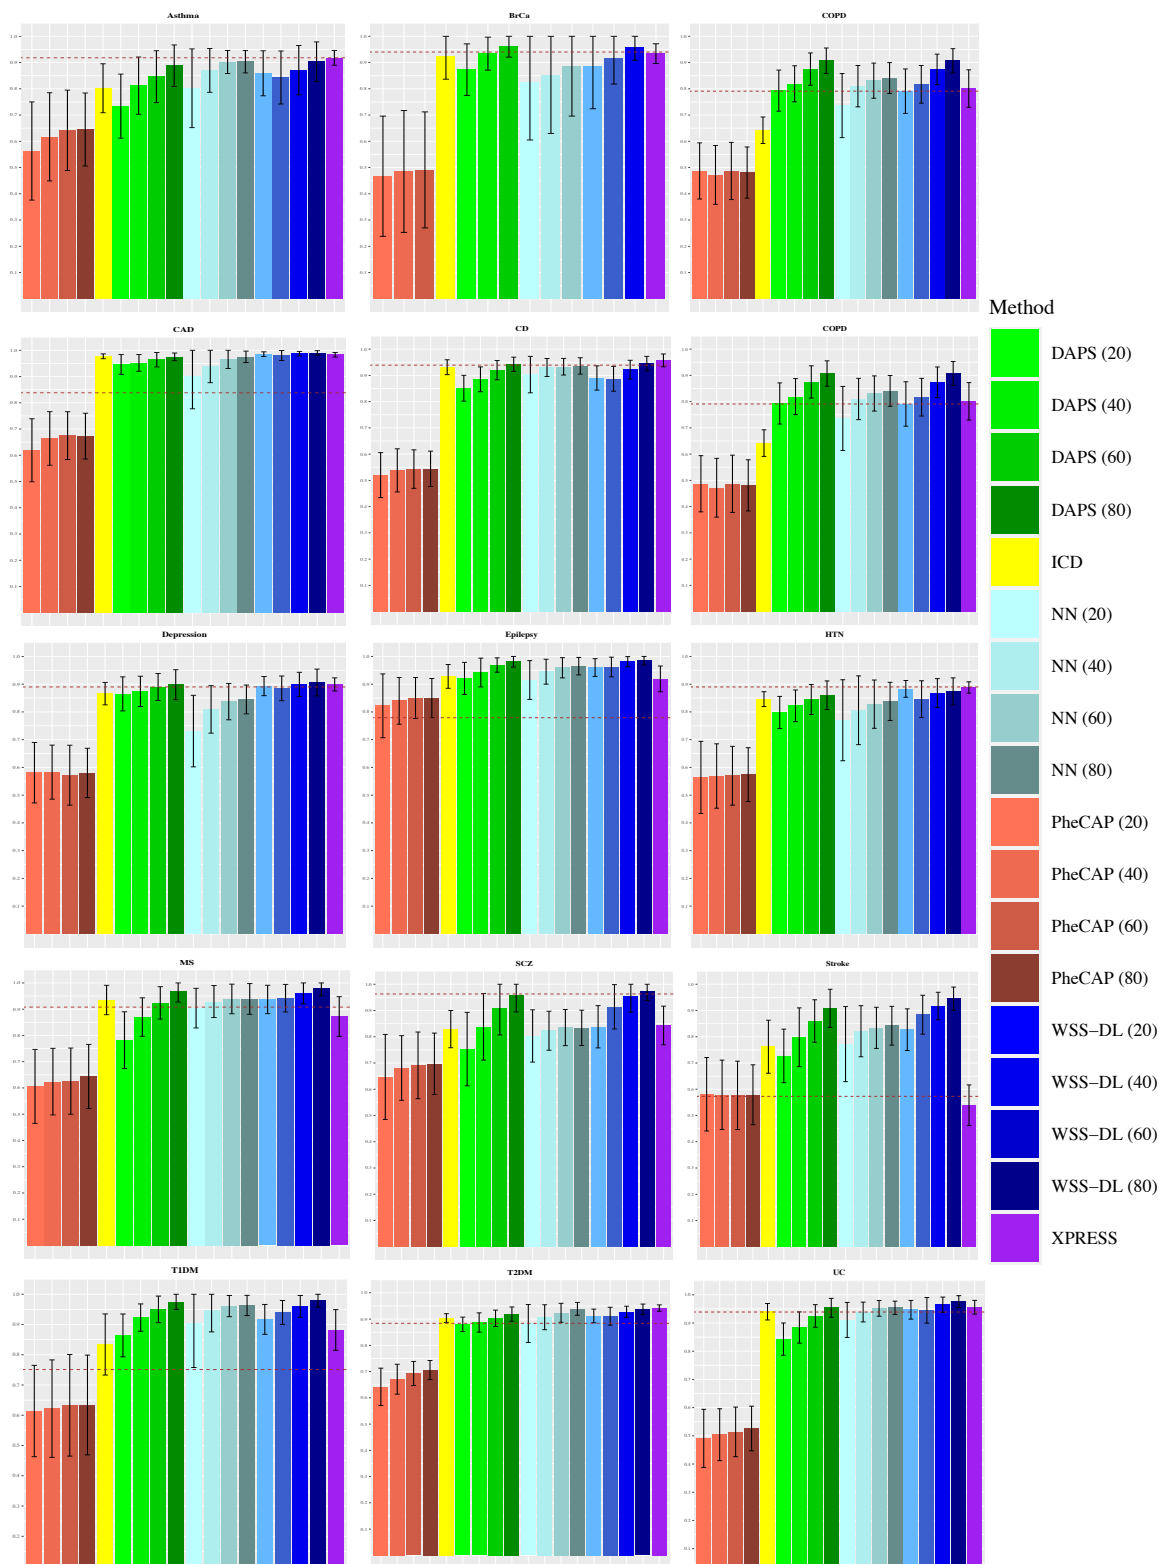

**Fig. 1.** Comparison of AUCs with gold standard labels for ICD-9 count, MAP, XPRESS, PheCAP ( $n = 20, 40, 60,$  and  $80$ ), DAPS ( $n = 20, 40, 60,$  and  $80$ ), NN ( $n = 20, 40, 60,$  and  $80$ ), and WSS-DL ( $n = 20, 40, 60,$  and  $80$ ) for 15 disease phenotypes. From left to right, top to bottom: Asthma, Breast Cancer, Chronic Obstructive Pulmonary Disorder, Depression, Epilepsy, Hypertension, Multiple Sclerosis, Rheumatoid Arthritis, Schizophrenia, Stroke, Type 1 Diabetes Mellitus, Type 2 Diabetes Mellitus, and Ulcerative Colitis.

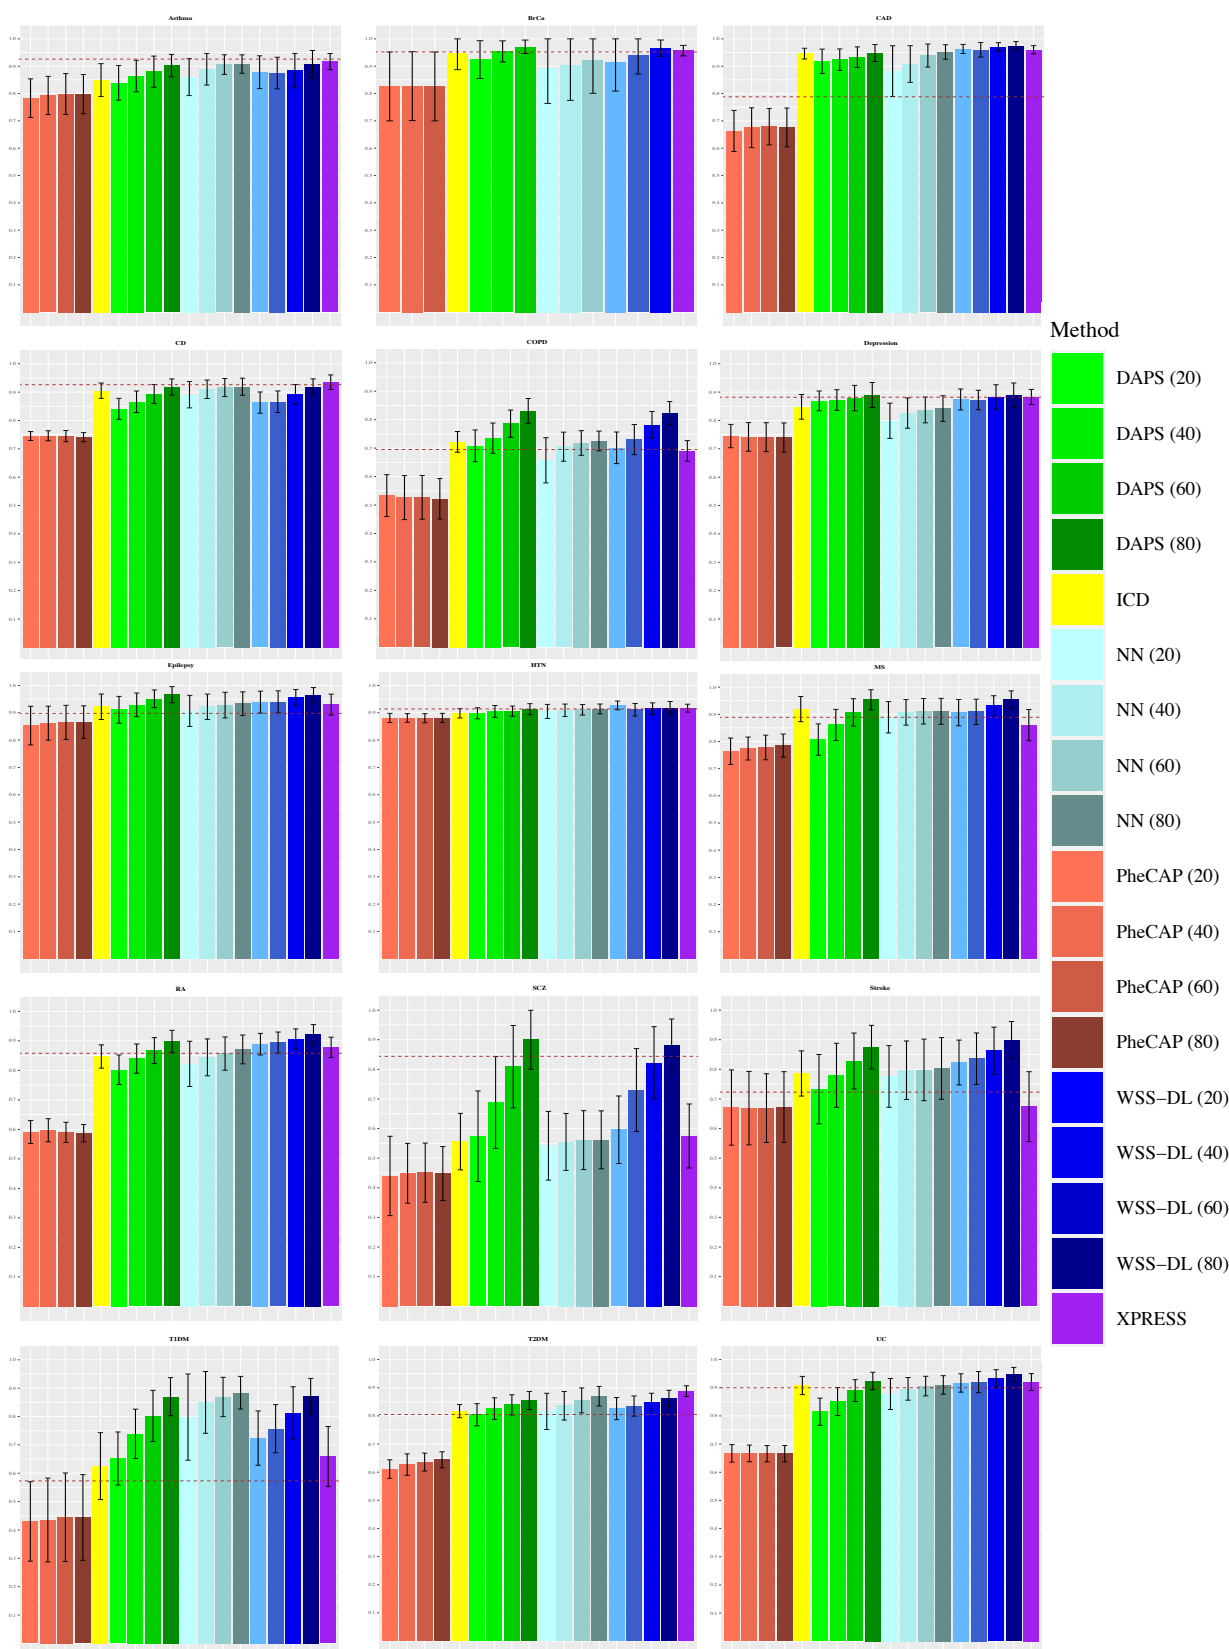

**Fig. 2.** Comparison of F-scores with gold standard labels for ICD-9 count, MAP, XPRESS, PheCAP ( $n = 20, 40, 60,$  and  $80$ ), DAPS ( $n = 20, 40, 60,$  and  $80$ ), NN ( $n = 20, 40, 60,$  and  $80$ ), and WSS-DL ( $n = 20, 40, 60,$  and  $80$ ) for 15 disease phenotypes. From left to right, top to bottom: Asthma, Breast Cancer, Chronic Obstructive Pulmonary Disorder, Depression, Epilepsy, Hypertension, Multiple Sclerosis, Rheumatoid Arthritis, Schizophrenia, Stroke, Type 1 Diabetes Mellitus, Type 2 Diabetes Mellitus, and Ulcerative Colitis.

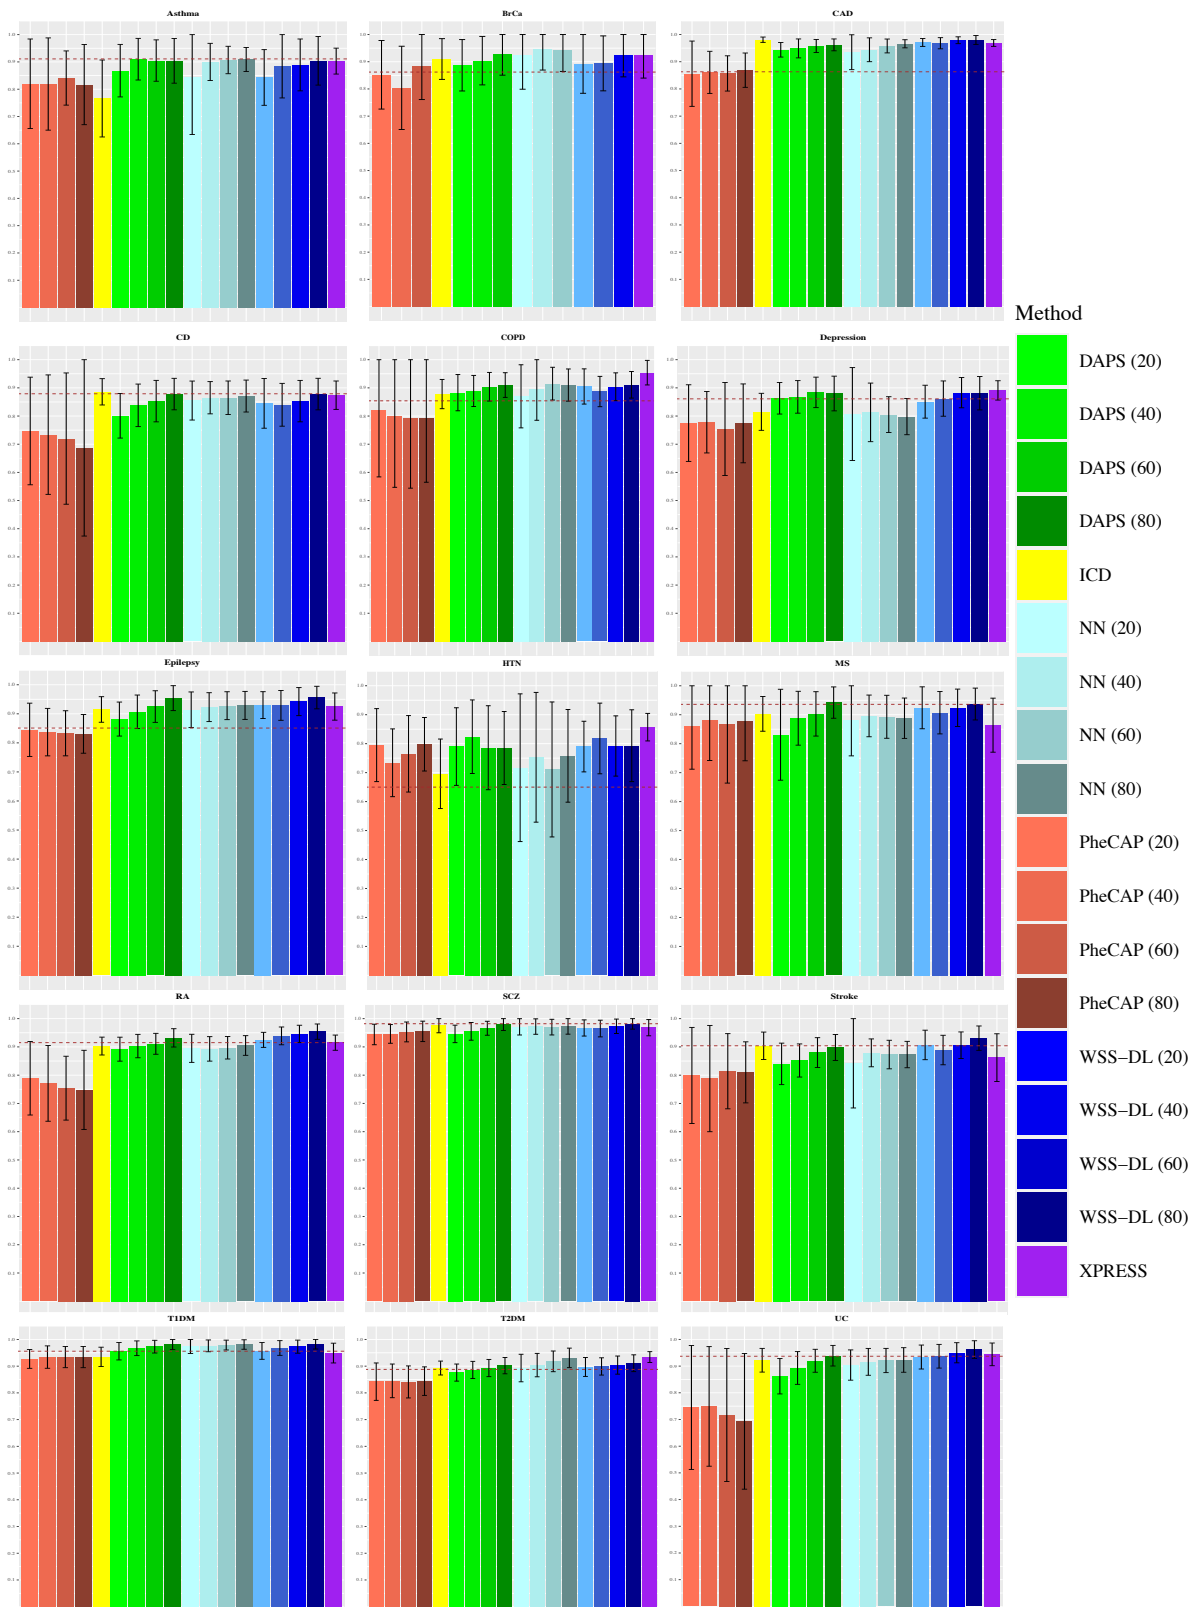

**Fig. 3.** Comparison of NPVs with gold standard labels for ICD-9 count, MAP, XPRESS, PheCAP ( $n = 20, 40, 60,$  and  $80$ ), DAPS ( $n = 20, 40, 60,$  and  $80$ ), NN ( $n = 20, 40, 60,$  and  $80$ ), and WSS-DL ( $n = 20, 40, 60,$  and  $80$ ) for 15 disease phenotypes. From left to right, top to bottom: Asthma, Breast Cancer, Chronic Obstructive Pulmonary Disorder, Depression, Epilepsy, Hypertension, Multiple Sclerosis, Rheumatoid Arthritis, Schizophrenia, Stroke, Type 1 Diabetes Mellitus, Type 2 Diabetes Mellitus, and Ulcerative Colitis.

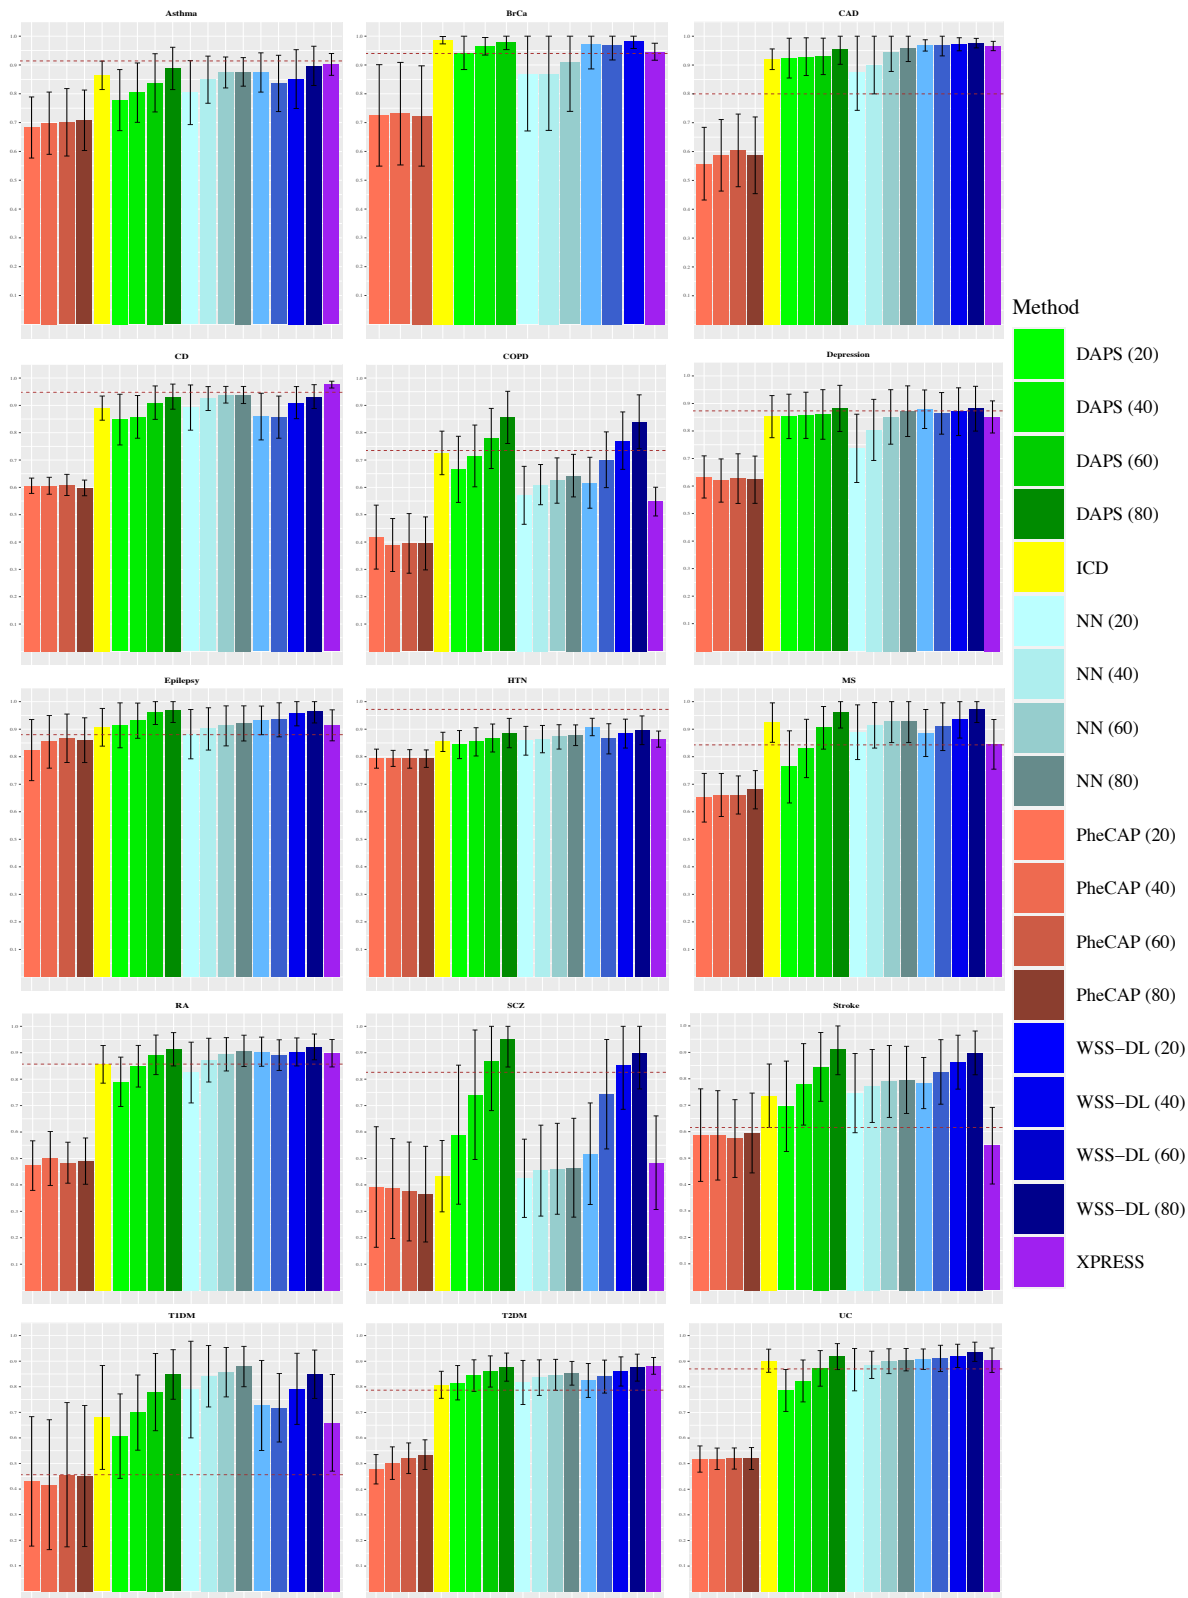

**Fig. 4.** Comparison of PPVs with gold standard labels for ICD-9 count, MAP, XPRESS, PheCAP ( $n = 20, 40, 60,$  and  $80$ ), DAPS ( $n = 20, 40, 60,$  and  $80$ ), NN ( $n = 20, 40, 60,$  and  $80$ ), and WSS-DL ( $n = 20, 40, 60,$  and  $80$ ) for 15 disease phenotypes. From left to right, top to bottom: Asthma, Breast Cancer, Chronic Obstructive Pulmonary Disorder, Depression, Epilepsy, Hypertension, Multiple Sclerosis, Rheumatoid Arthritis, Schizophrenia, Stroke, Type 1 Diabetes Mellitus, Type 2 Diabetes Mellitus, and Ulcerative Colitis.

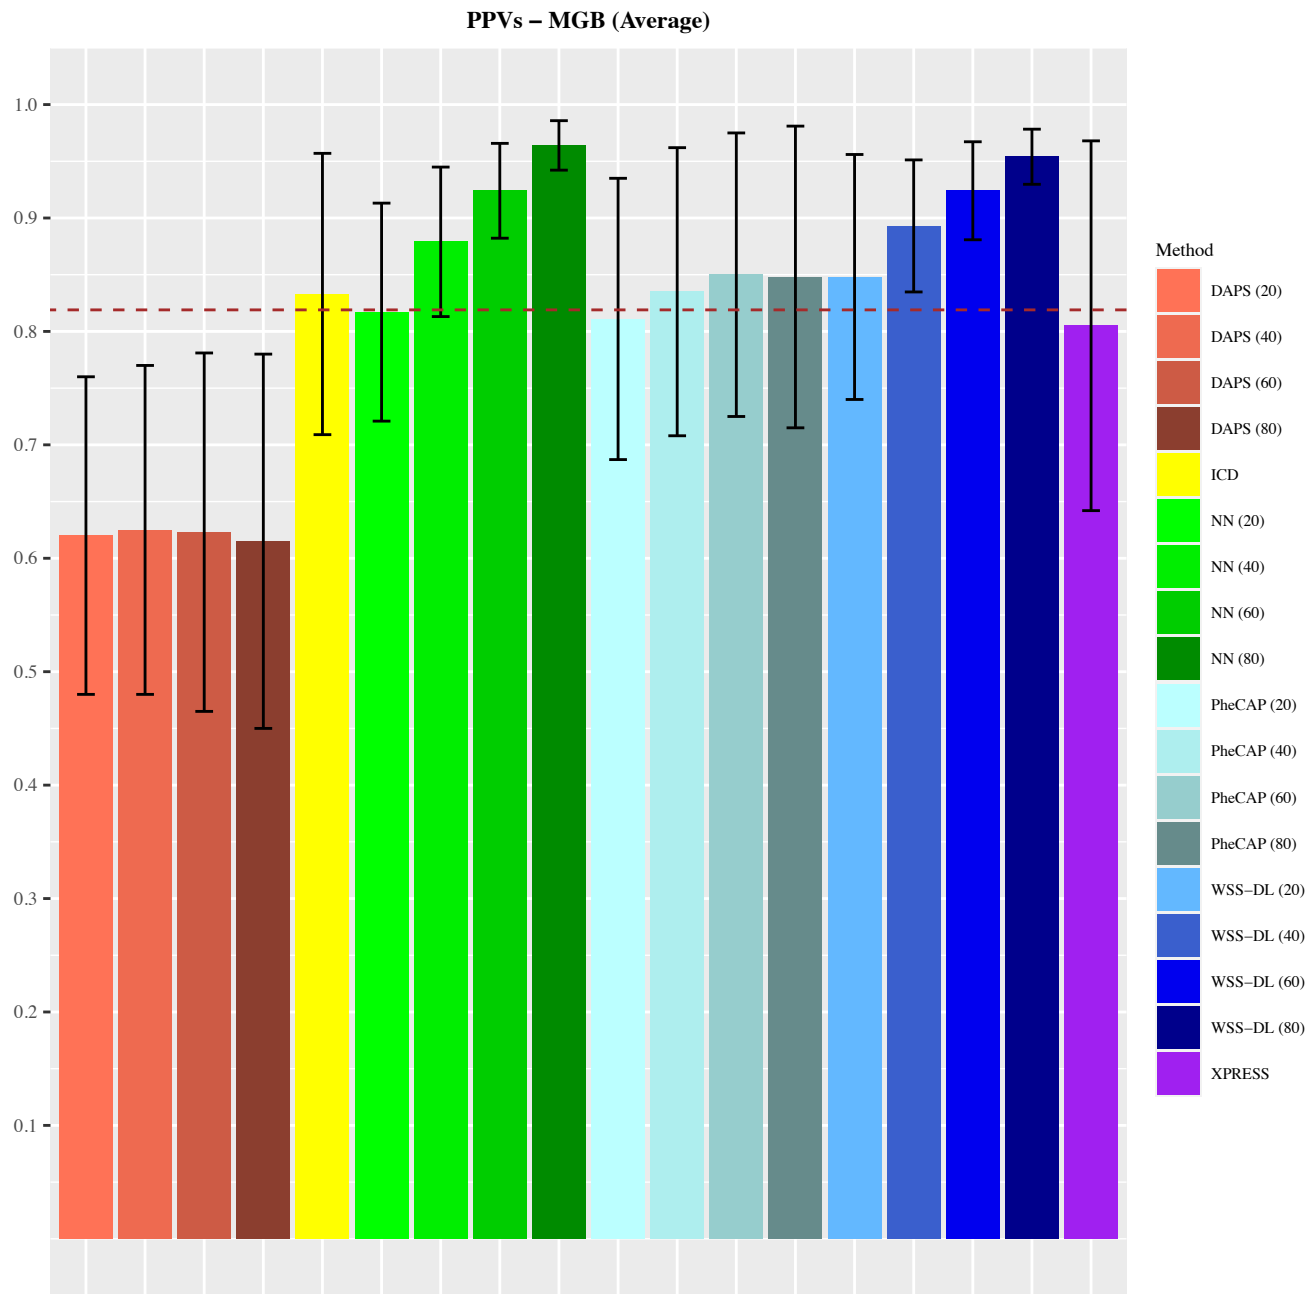

**Fig. 5** Comparison of PPVs with gold standard labels for ICD-9 count, MAP, XPRESS, PheCAP (n = 20, 40, 60, and 80), DAPS (n = 20, 40, 60, and 80), NN (n = 20, 40, 60, and 80), and WSS-DL (n = 20, 40, 60, and 80), averaged over 15 phenotypes (MGB).

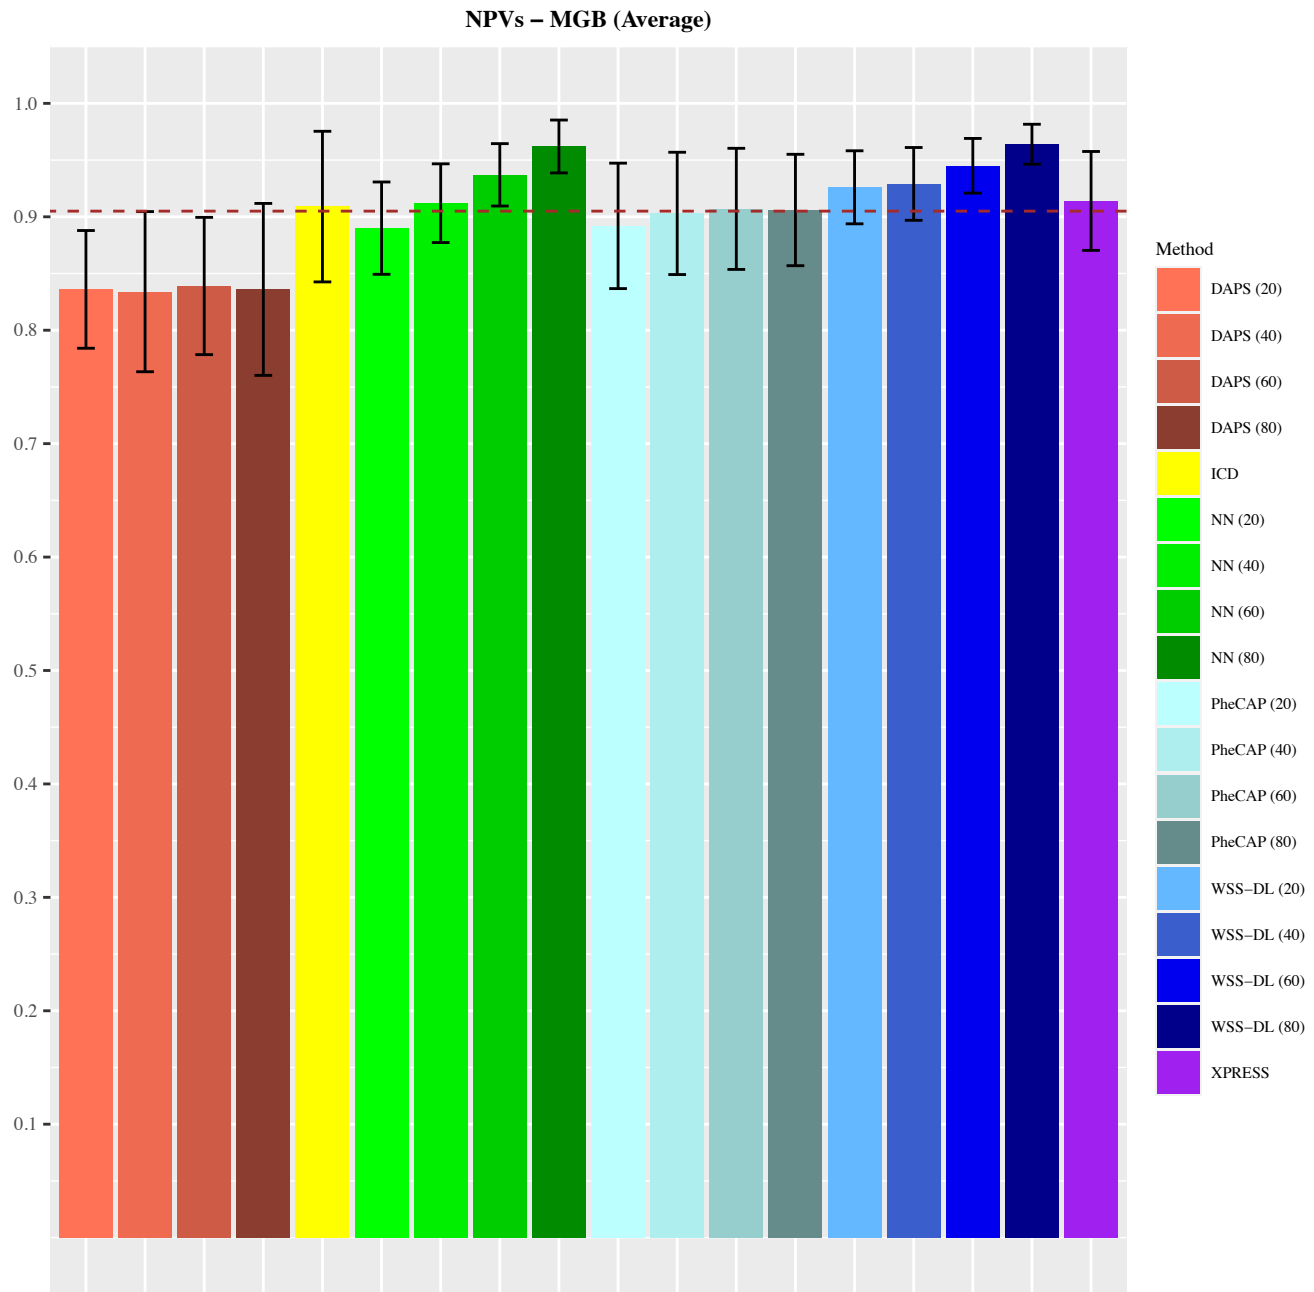

**Fig. 6** Comparison of NPVs with gold standard labels for ICD-9 count, MAP, XPRESS, PheCAP (n = 20, 40, 60, and 80), DAPS (n = 20, 40, 60, and 80), NN (n = 20, 40, 60, and 80), and WSS-DL (n = 20, 40, 60, and 80), averaged over 15 disease phenotypes (MGB).



MGB – Pseudogout

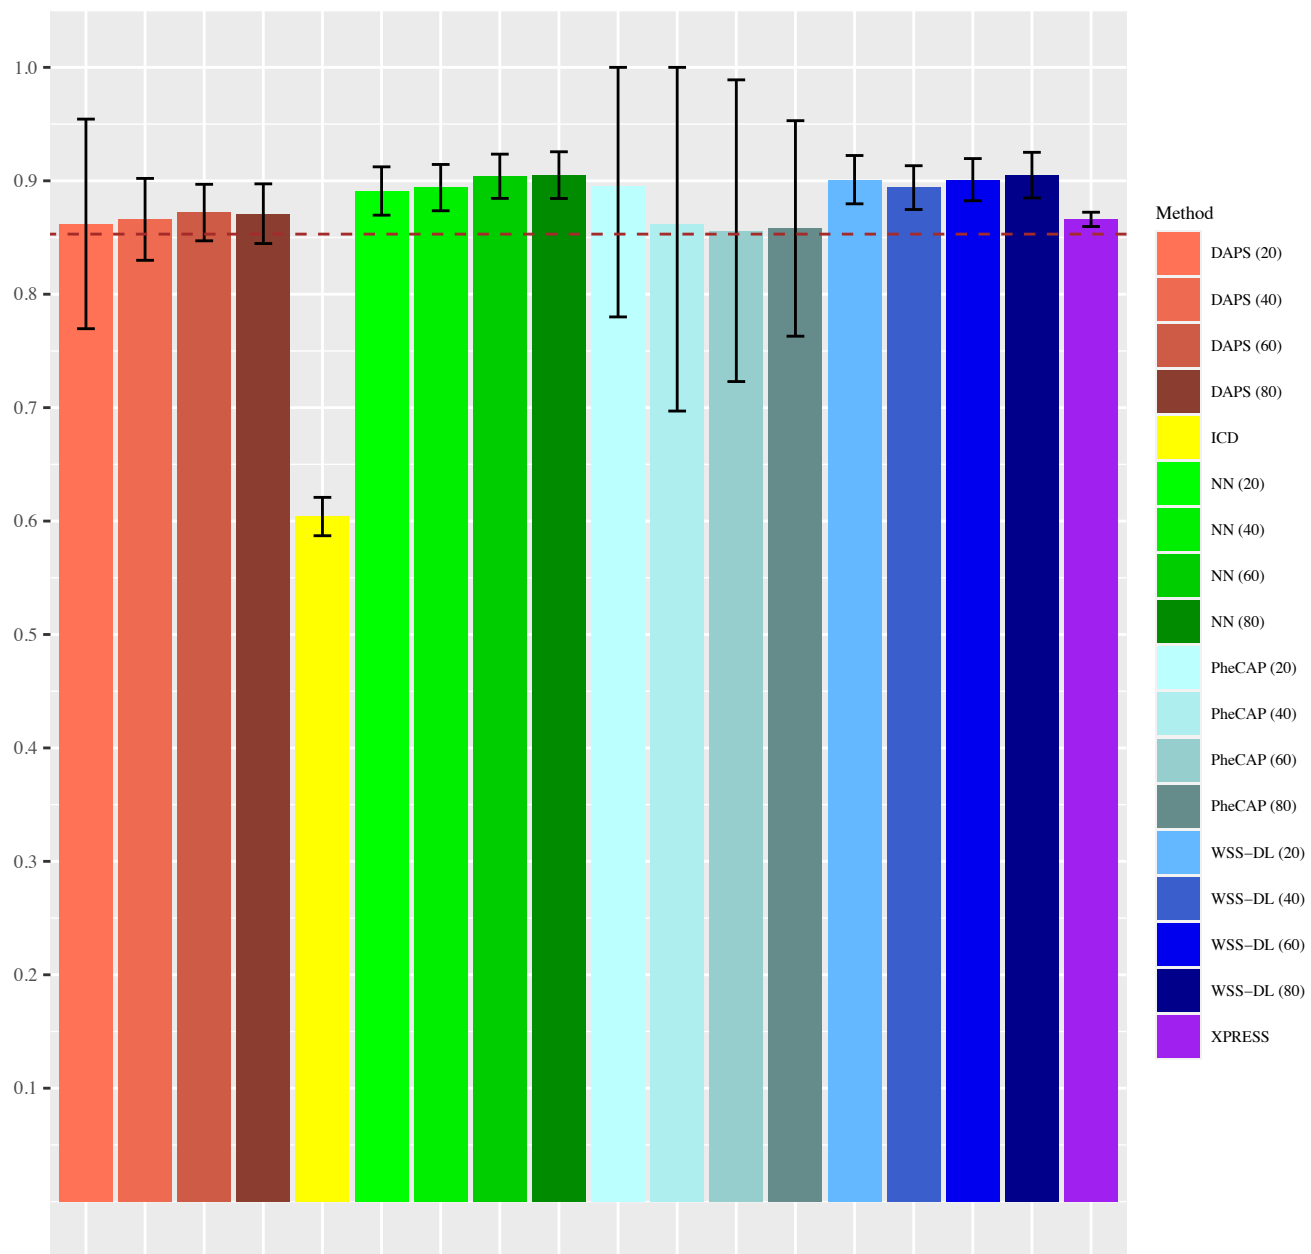

**Fig. 7** Comparison of NPVs with gold standard labels for ICD-9 count, MAP, XPRESS, PheCAP (n = 20, 40, 60, and 80), DAPS (n = 20, 40, 60, and 80), NN (n = 20, 40, 60, and 80), and WSS-DL (n = 20, 40, 60, and 80), for MGB – Pseudogout cohort.

MGB – Pseudogout

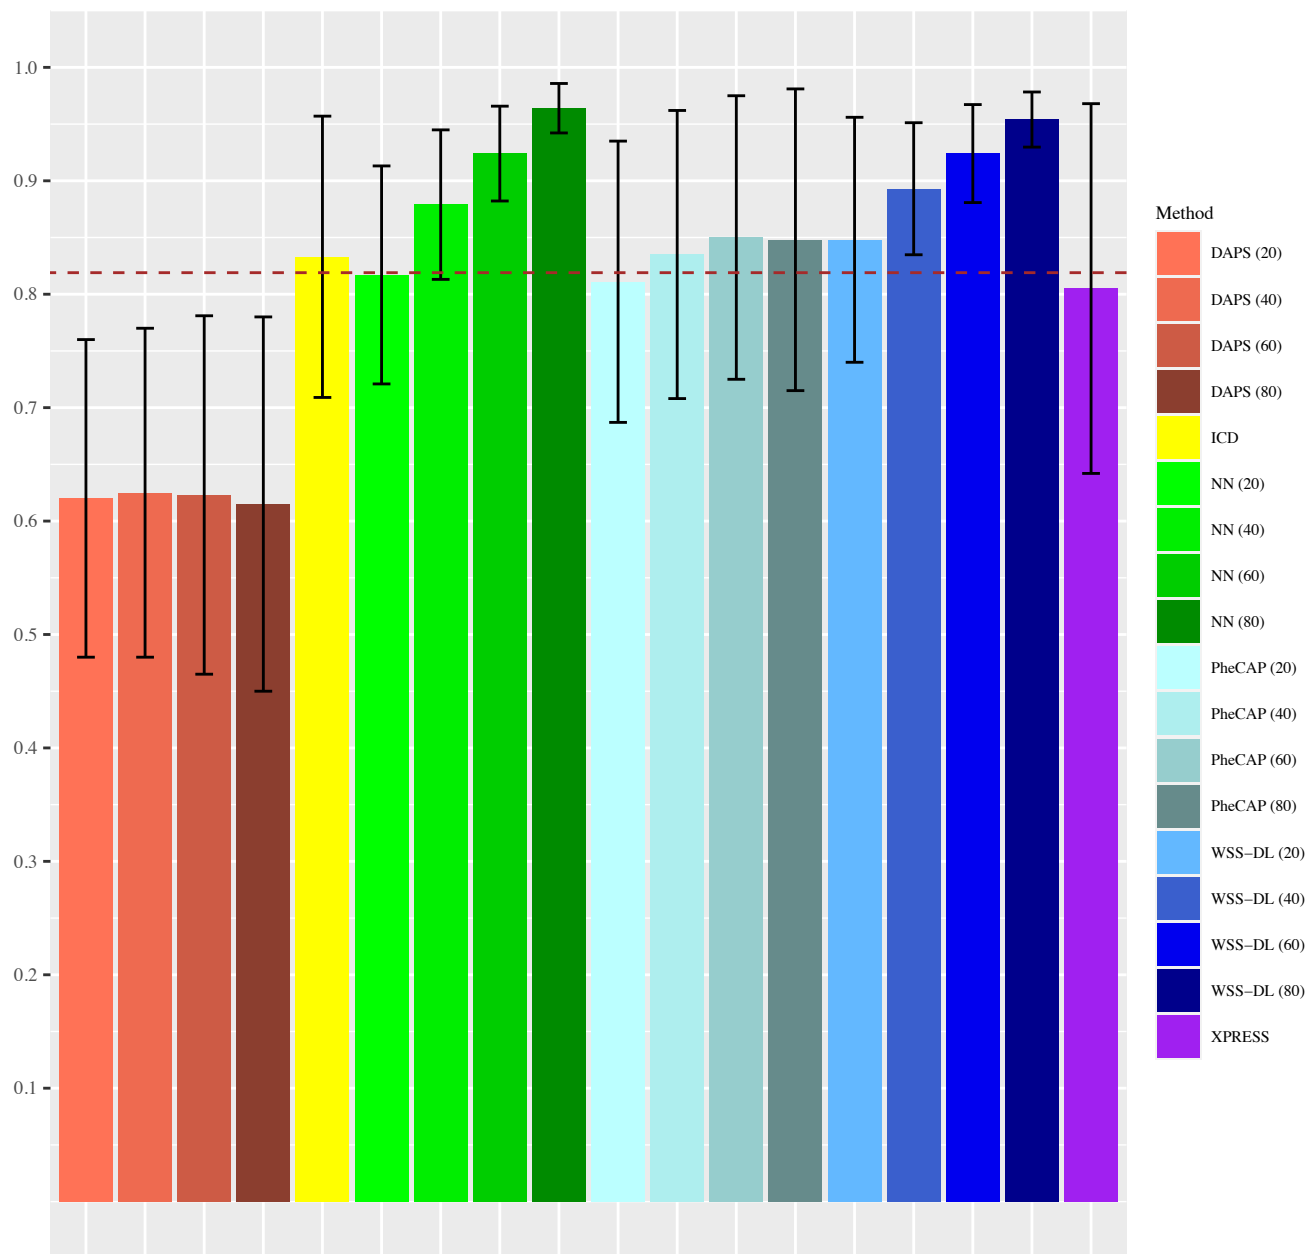

**Fig. 8** Comparison of PPVs with gold standard labels for ICD-9 count, MAP, XPRESS, PheCAP (n = 20, 40, 60, and 80), DAPS (n = 20, 40, 60, and 80), NN (n = 20, 40, 60, and 80), and WSS-DL (n = 20, 40, 60, and 80), for MGB-Pseudogout cohort.

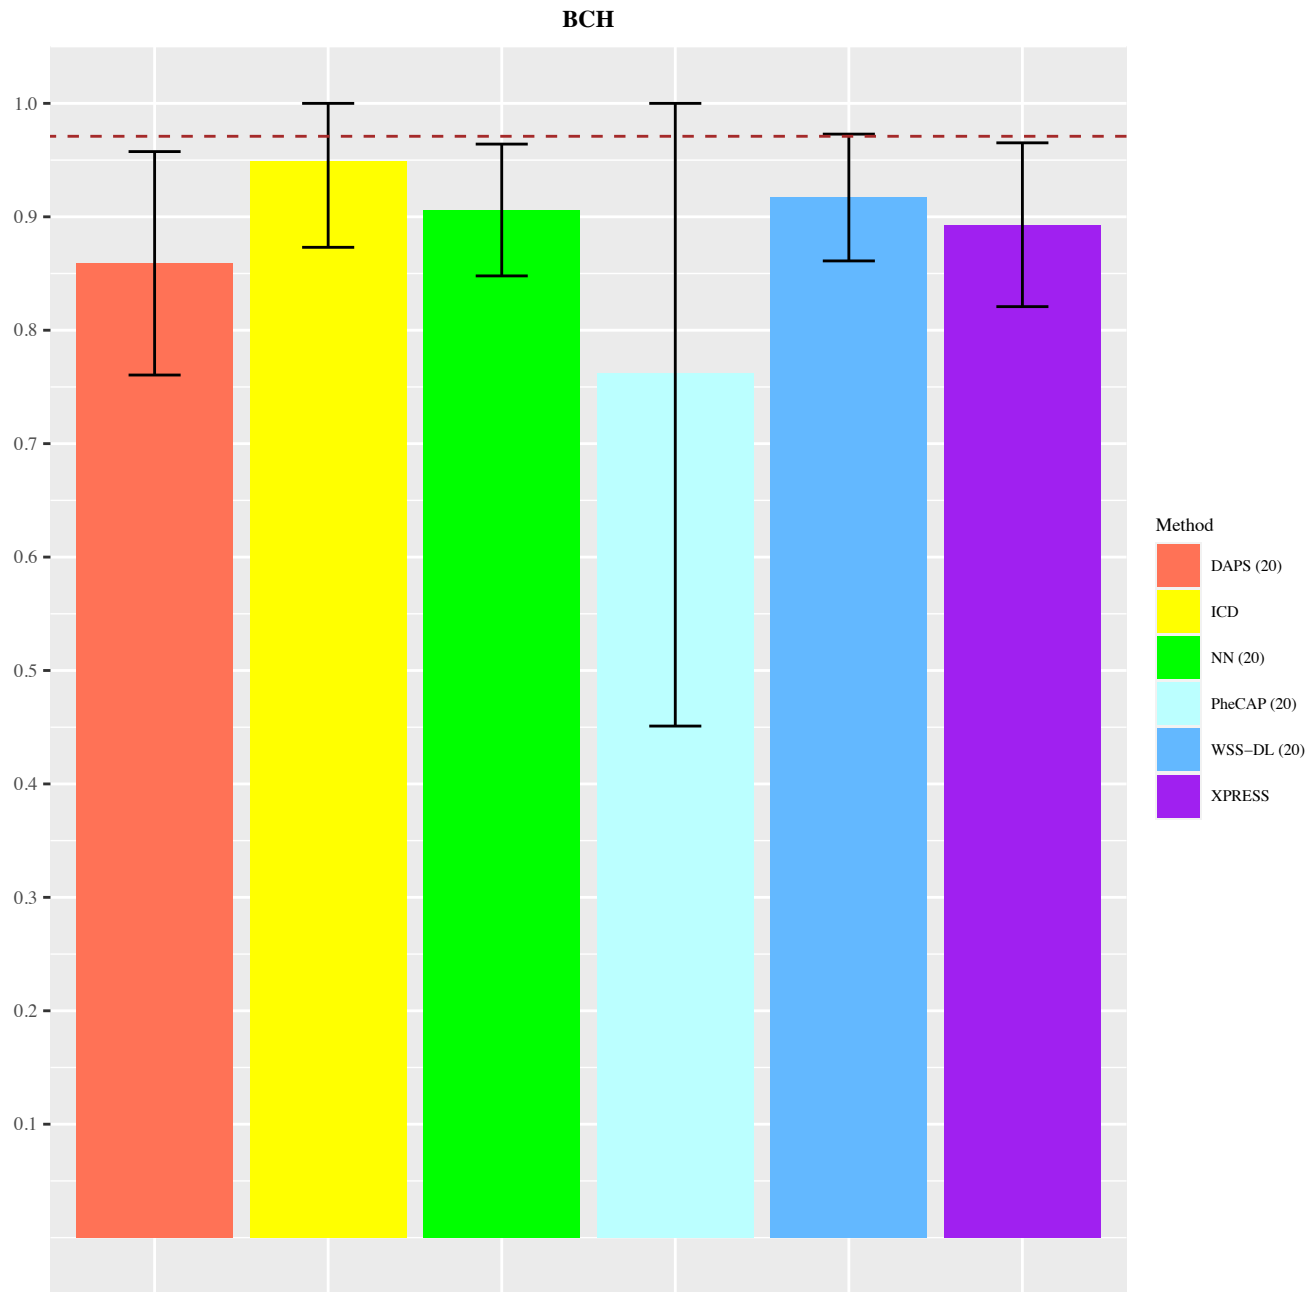

**Fig. 9** Comparison of NPVs with gold standard labels for ICD-9 count, MAP, XPRESS, PheCAP (n = 20), DAPS (n = 20), NN (n = 20), and WSS-DL (n = 20) for BCH cohort.

### BCH

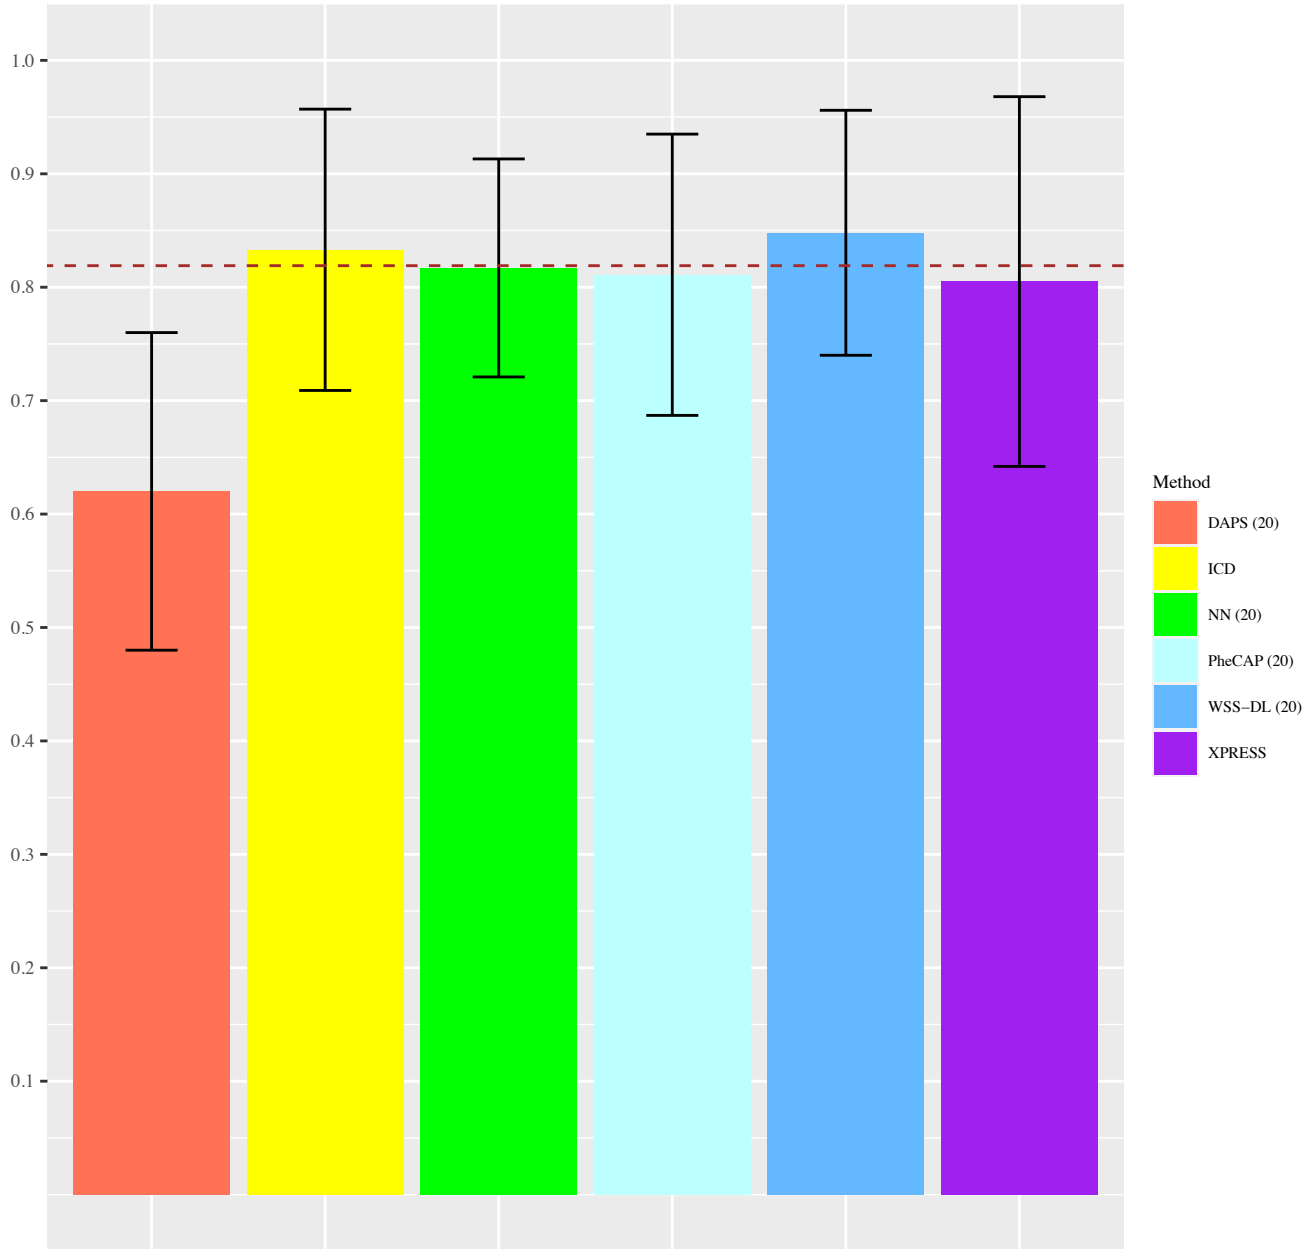

**Fig. 10** Comparison of PPVs with gold standard labels for ICD-9 count, MAP, XPRESS, PheCAP (n = 20), DAPS (n = 20), NN (n = 20), and WSS-DL (n = 20) for BCH cohort.

| Method      | Asthma | PARDS | BrCa  | CAD   | CD    | COPD  | Depression | Epilepsy | HTN   | MS    | pGout | RA    | SCZ   | Stroke | T1DM  | T2DM  | UC    |
|-------------|--------|-------|-------|-------|-------|-------|------------|----------|-------|-------|-------|-------|-------|--------|-------|-------|-------|
| WSS-DL (20) | 0.859  | 0.907 | 0.886 | 0.985 | 0.89  | 0.791 | 0.893      | 0.96     | 0.883 | 0.937 | 0.696 | 0.942 | 0.838 | 0.827  | 0.917 | 0.912 | 0.947 |
| WSS-DL (40) | 0.843  | NA    | 0.915 | 0.98  | 0.887 | 0.817 | 0.885      | 0.962    | 0.846 | 0.942 | 0.777 | 0.947 | 0.914 | 0.884  | 0.94  | 0.911 | 0.945 |
| WSS-DL (60) | 0.871  | NA    | 0.957 | 0.987 | 0.922 | 0.874 | 0.899      | 0.981    | 0.868 | 0.961 | 0.797 | 0.957 | 0.955 | 0.917  | 0.96  | 0.928 | 0.965 |
| WSS-DL (80) | 0.903  | NA    | NA    | 0.99  | 0.945 | 0.907 | 0.906      | 0.986    | 0.874 | 0.981 | 0.817 | 0.969 | 0.975 | 0.945  | 0.98  | 0.937 | 0.976 |
| ICD         | 0.802  | 0.521 | 0.924 | 0.977 | 0.931 | 0.642 | 0.866      | 0.928    | 0.846 | 0.935 | 0.604 | 0.923 | 0.829 | 0.762  | 0.834 | 0.904 | 0.94  |
| Silver std. | 0.918  | 0.919 | 0.94  | 0.838 | 0.939 | 0.791 | 0.89       | 0.779    | 0.89  | 0.908 | 0.717 | 0.926 | 0.963 | 0.573  | 0.751 | 0.884 | 0.939 |
| PheCAP (20) | 0.802  | 0.53  | 0.824 | 0.9   | 0.903 | 0.736 | 0.731      | 0.915    | 0.77  | 0.904 | 0.535 | 0.882 | 0.803 | 0.772  | 0.904 | 0.883 | 0.911 |
| PheCAP (40) | 0.87   | NA    | 0.851 | 0.939 | 0.93  | 0.81  | 0.809      | 0.945    | 0.806 | 0.929 | 0.546 | 0.895 | 0.823 | 0.821  | 0.947 | 0.907 | 0.939 |
| PheCAP (60) | 0.902  | NA    | 0.886 | 0.966 | 0.933 | 0.831 | 0.837      | 0.959    | 0.828 | 0.939 | 0.561 | 0.909 | 0.835 | 0.834  | 0.961 | 0.924 | 0.952 |
| PheCAP (80) | 0.903  | NA    | NA    | 0.975 | 0.936 | 0.841 | 0.845      | 0.965    | 0.838 | 0.939 | 0.572 | 0.918 | 0.834 | 0.842  | 0.963 | 0.939 | 0.954 |
| Xpress      | 0.918  | 0.772 | 0.934 | 0.983 | 0.957 | 0.801 | 0.899      | 0.919    | 0.888 | 0.872 | 0.748 | 0.939 | 0.843 | 0.539  | 0.882 | 0.942 | 0.956 |
| DAPS (20)   | 0.563  | 0.636 | 0.467 | 0.619 | 0.52  | 0.487 | 0.581      | 0.822    | 0.564 | 0.606 | 0.603 | 0.577 | 0.647 | 0.581  | 0.614 | 0.642 | 0.491 |
| DAPS (40)   | 0.617  | NA    | 0.485 | 0.664 | 0.538 | 0.472 | 0.583      | 0.84     | 0.569 | 0.624 | 0.62  | 0.597 | 0.681 | 0.579  | 0.622 | 0.671 | 0.504 |
| DAPS (60)   | 0.642  | NA    | 0.491 | 0.675 | 0.543 | 0.487 | 0.572      | 0.85     | 0.57  | 0.626 | 0.63  | 0.594 | 0.691 | 0.577  | 0.633 | 0.693 | 0.514 |
| DAPS (80)   | 0.645  | NA    | NA    | 0.673 | 0.544 | 0.481 | 0.58       | 0.85     | 0.574 | 0.644 | 0.634 | 0.595 | 0.697 | 0.579  | 0.634 | 0.706 | 0.526 |
| NN (20)     | 0.734  | 0.912 | 0.873 | 0.946 | 0.851 | 0.793 | 0.865      | 0.921    | 0.798 | 0.782 | 0.742 | 0.878 | 0.753 | 0.727  | 0.864 | 0.88  | 0.843 |
| NN (40)     | 0.812  | NA    | 0.934 | 0.952 | 0.885 | 0.819 | 0.874      | 0.942    | 0.822 | 0.87  | 0.776 | 0.9   | 0.838 | 0.798  | 0.923 | 0.887 | 0.884 |
| NN (60)     | 0.846  | NA    | 0.963 | 0.964 | 0.92  | 0.875 | 0.89       | 0.969    | 0.845 | 0.924 | 0.795 | 0.925 | 0.908 | 0.86   | 0.95  | 0.903 | 0.925 |
| NN (80)     | 0.888  | NA    | NA    | 0.975 | 0.942 | 0.907 | 0.898      | 0.982    | 0.86  | 0.968 | 0.816 | 0.948 | 0.957 | 0.908  | 0.975 | 0.919 | 0.954 |

**Table 1.** AUCs of disease status prediction - WSS-DL (n = 20, 40,60,80), PheCAP, WSS-DL (n = 20, 40,60,80), silver standard labels, raw ICD-9 codes, DAPS (n = 20, 40,60,80), and NN (n = 20, 40,60,80)

| Method      | Asthma | PARDS | BrCa  | CAD   | CD    | COPD  | Depression | Epilepsy | HTN   | MS    | pGout | RA    | SCZ   | Stroke | T1DM  | T2DM  | UC    |
|-------------|--------|-------|-------|-------|-------|-------|------------|----------|-------|-------|-------|-------|-------|--------|-------|-------|-------|
| WSS-DL (20) | 0.874  | 0.837 | 0.973 | 0.968 | 0.859 | 0.617 | 0.879      | 0.932    | 0.908 | 0.886 | 0.436 | 0.904 | 0.518 | 0.784  | 0.727 | 0.825 | 0.908 |
| WSS-DL (40) | 0.836  | NA    | 0.97  | 0.968 | 0.857 | 0.701 | 0.864      | 0.934    | 0.865 | 0.909 | 0.512 | 0.891 | 0.743 | 0.826  | 0.718 | 0.84  | 0.911 |
| WSS-DL (60) | 0.851  | NA    | 0.981 | 0.972 | 0.91  | 0.771 | 0.87       | 0.958    | 0.884 | 0.936 | 0.55  | 0.903 | 0.854 | 0.863  | 0.792 | 0.86  | 0.921 |
| WSS-DL (80) | 0.897  | NA    | NA    | 0.976 | 0.932 | 0.84  | 0.881      | 0.964    | 0.896 | 0.972 | 0.578 | 0.922 | 0.897 | 0.898  | 0.849 | 0.875 | 0.937 |
| ICD         | 0.864  | 0.594 | 0.986 | 0.92  | 0.89  | 0.726 | 0.852      | 0.907    | 0.854 | 0.924 | 0.294 | 0.856 | 0.433 | 0.736  | 0.68  | 0.808 | 0.902 |
| Silver std. | 0.914  | 0.794 | 0.94  | 0.8   | 0.948 | 0.735 | 0.873      | 0.88     | 0.972 | 0.843 | 0.785 | 0.857 | 0.826 | 0.616  | 0.456 | 0.787 | 0.87  |
| PheCAP (20) | 0.804  | 0.504 | 0.867 | 0.875 | 0.892 | 0.571 | 0.737      | 0.882    | 0.858 | 0.889 | 0.252 | 0.825 | 0.425 | 0.746  | 0.789 | 0.817 | 0.867 |
| PheCAP (40) | 0.849  | NA    | 0.869 | 0.901 | 0.925 | 0.61  | 0.804      | 0.901    | 0.864 | 0.914 | 0.257 | 0.872 | 0.454 | 0.773  | 0.841 | 0.836 | 0.886 |
| PheCAP (60) | 0.874  | NA    | 0.908 | 0.945 | 0.939 | 0.625 | 0.851      | 0.912    | 0.872 | 0.927 | 0.269 | 0.894 | 0.461 | 0.79   | 0.857 | 0.847 | 0.9   |
| PheCAP (80) | 0.876  | NA    | NA    | 0.957 | 0.938 | 0.643 | 0.872      | 0.921    | 0.878 | 0.929 | 0.271 | 0.907 | 0.465 | 0.796  | 0.879 | 0.853 | 0.906 |
| Xpress      | 0.902  | 0.621 | 0.946 | 0.966 | 0.976 | 0.548 | 0.851      | 0.914    | 0.864 | 0.845 | 0.609 | 0.898 | 0.484 | 0.547  | 0.659 | 0.882 | 0.904 |
| DAPS (20)   | 0.683  | 0.539 | 0.725 | 0.558 | 0.606 | 0.418 | 0.633      | 0.824    | 0.793 | 0.651 | 0.289 | 0.473 | 0.392 | 0.587  | 0.43  | 0.478 | 0.518 |
| DAPS (40)   | 0.698  | NA    | 0.731 | 0.587 | 0.606 | 0.389 | 0.62       | 0.854    | 0.794 | 0.661 | 0.299 | 0.5   | 0.386 | 0.586  | 0.417 | 0.502 | 0.519 |
| DAPS (60)   | 0.701  | NA    | 0.723 | 0.604 | 0.609 | 0.395 | 0.627      | 0.867    | 0.792 | 0.661 | 0.304 | 0.484 | 0.375 | 0.574  | 0.456 | 0.521 | 0.52  |
| DAPS (80)   | 0.708  | NA    | NA    | 0.587 | 0.598 | 0.395 | 0.623      | 0.86     | 0.793 | 0.68  | 0.308 | 0.49  | 0.365 | 0.595  | 0.451 | 0.535 | 0.52  |
| NN (20)     | 0.778  | 0.879 | 0.942 | 0.924 | 0.848 | 0.666 | 0.853      | 0.914    | 0.844 | 0.763 | 0.443 | 0.79  | 0.59  | 0.696  | 0.607 | 0.816 | 0.786 |
| NN (40)     | 0.804  | NA    | 0.965 | 0.929 | 0.858 | 0.715 | 0.857      | 0.931    | 0.854 | 0.83  | 0.518 | 0.849 | 0.741 | 0.779  | 0.699 | 0.844 | 0.823 |
| NN (60)     | 0.838  | NA    | 0.979 | 0.93  | 0.91  | 0.779 | 0.86       | 0.961    | 0.868 | 0.905 | 0.555 | 0.892 | 0.869 | 0.845  | 0.779 | 0.86  | 0.872 |
| NN (80)     | 0.888  | NA    | NA    | 0.954 | 0.932 | 0.856 | 0.882      | 0.968    | 0.886 | 0.961 | 0.586 | 0.913 | 0.952 | 0.911  | 0.848 | 0.877 | 0.918 |

**Table 2.** PPVs of disease status prediction - WSS-DL (n = 20, 40,60,80), PheCAP, WSS-DL (n = 20, 40,60,80), silver standard labels, raw ICD-9 codes, DAPS (n = 20, 40,60,80), and NN (n = 20, 40,60,80)

| Method      | Asthma | PARDS | BrCa  | CAD   | CD    | COPD  | Depression | Epilepsy | HTN   | MS    | pGout | RA    | SCZ   | Stroke | T1DM  | T2DM  | UC    |
|-------------|--------|-------|-------|-------|-------|-------|------------|----------|-------|-------|-------|-------|-------|--------|-------|-------|-------|
| WSS-DL (20) | 0.843  | 0.917 | 0.892 | 0.971 | 0.845 | 0.905 | 0.851      | 0.93     | 0.79  | 0.924 | 0.873 | 0.925 | 0.967 | 0.907  | 0.957 | 0.897 | 0.934 |
| WSS-DL (40) | 0.886  | NA    | 0.894 | 0.968 | 0.84  | 0.887 | 0.862      | 0.929    | 0.818 | 0.907 | 0.894 | 0.939 | 0.965 | 0.889  | 0.968 | 0.899 | 0.937 |
| WSS-DL (60) | 0.889  | NA    | 0.923 | 0.979 | 0.853 | 0.904 | 0.883      | 0.942    | 0.792 | 0.924 | 0.901 | 0.946 | 0.973 | 0.906  | 0.973 | 0.904 | 0.95  |
| WSS-DL (80) | 0.904  | NA    | NA    | 0.98  | 0.878 | 0.911 | 0.881      | 0.956    | 0.793 | 0.937 | 0.905 | 0.954 | 0.982 | 0.931  | 0.984 | 0.911 | 0.962 |
| ICD         | 0.766  | 0.949 | 0.91  | 0.981 | 0.886 | 0.878 | 0.815      | 0.915    | 0.696 | 0.903 | 0.858 | 0.903 | 0.975 | 0.904  | 0.935 | 0.893 | 0.922 |
| Silver std. | 0.911  | 0.971 | 0.862 | 0.863 | 0.879 | 0.854 | 0.861      | 0.851    | 0.65  | 0.936 | 0.927 | 0.915 | 0.982 | 0.904  | 0.956 | 0.888 | 0.937 |
| PheCAP (20) | 0.846  | 0.762 | 0.926 | 0.935 | 0.855 | 0.87  | 0.807      | 0.914    | 0.717 | 0.881 | 0.895 | 0.895 | 0.971 | 0.843  | 0.974 | 0.893 | 0.904 |
| PheCAP (40) | 0.9    | NA    | 0.945 | 0.944 | 0.865 | 0.897 | 0.813      | 0.923    | 0.753 | 0.896 | 0.862 | 0.893 | 0.972 | 0.879  | 0.976 | 0.904 | 0.916 |
| PheCAP (60) | 0.907  | NA    | 0.944 | 0.958 | 0.865 | 0.915 | 0.805      | 0.928    | 0.711 | 0.893 | 0.856 | 0.897 | 0.97  | 0.873  | 0.979 | 0.918 | 0.921 |
| PheCAP (80) | 0.909  | NA    | NA    | 0.966 | 0.871 | 0.91  | 0.798      | 0.929    | 0.758 | 0.888 | 0.858 | 0.905 | 0.973 | 0.873  | 0.981 | 0.931 | 0.923 |
| Xpress      | 0.903  | 0.893 | 0.925 | 0.969 | 0.874 | 0.954 | 0.891      | 0.925    | 0.857 | 0.864 | 0.884 | 0.915 | 0.968 | 0.862  | 0.949 | 0.934 | 0.944 |
| DAPS (20)   | 0.82   | 0.859 | 0.852 | 0.856 | 0.747 | 0.82  | 0.775      | 0.845    | 0.795 | 0.861 | 0.862 | 0.789 | 0.944 | 0.799  | 0.927 | 0.842 | 0.745 |
| DAPS (40)   | 0.819  | NA    | 0.804 | 0.861 | 0.734 | 0.801 | 0.778      | 0.837    | 0.734 | 0.881 | 0.866 | 0.771 | 0.946 | 0.788  | 0.934 | 0.845 | 0.749 |
| DAPS (60)   | 0.841  | NA    | 0.884 | 0.857 | 0.72  | 0.792 | 0.754      | 0.833    | 0.765 | 0.867 | 0.872 | 0.754 | 0.953 | 0.814  | 0.934 | 0.841 | 0.717 |
| DAPS (80)   | 0.817  | NA    | NA    | 0.869 | 0.687 | 0.792 | 0.774      | 0.831    | 0.798 | 0.877 | 0.871 | 0.748 | 0.955 | 0.81   | 0.934 | 0.844 | 0.693 |
| NN (20)     | 0.868  | 0.906 | 0.887 | 0.944 | 0.801 | 0.883 | 0.863      | 0.882    | 0.79  | 0.831 | 0.891 | 0.892 | 0.946 | 0.84   | 0.956 | 0.876 | 0.862 |
| NN (40)     | 0.91   | NA    | 0.904 | 0.949 | 0.838 | 0.889 | 0.868      | 0.907    | 0.824 | 0.888 | 0.894 | 0.903 | 0.955 | 0.852  | 0.967 | 0.886 | 0.893 |
| NN (60)     | 0.905  | NA    | 0.929 | 0.958 | 0.853 | 0.904 | 0.884      | 0.925    | 0.786 | 0.903 | 0.904 | 0.911 | 0.966 | 0.88   | 0.973 | 0.893 | 0.92  |
| NN (80)     | 0.904  | NA    | NA    | 0.962 | 0.878 | 0.91  | 0.88       | 0.954    | 0.785 | 0.942 | 0.905 | 0.932 | 0.98  | 0.898  | 0.982 | 0.902 | 0.939 |

**Table 3.** NPVs of disease status prediction - WSS-DL (n = 20, 40,60,80), PheCAP, WSS-DL (n = 20, 40,60,80), silver standard labels, raw ICD-9 codes, DAPS (n = 20, 40,60,80), and NN (n = 20, 40,60,80)

| Method      | Asthma | PARDS | BrCa  | CAD   | CD    | COPD  | Depression | Epilepsy | HTN   | MS    | pGout | RA    | SCZ   | Stroke | T1DM  | T2DM  | UC    |
|-------------|--------|-------|-------|-------|-------|-------|------------|----------|-------|-------|-------|-------|-------|--------|-------|-------|-------|
| WSS-DL (20) | 0.878  | 0.842 | 0.916 | 0.963 | 0.863 | 0.701 | 0.874      | 0.939    | 0.927 | 0.906 | 0.557 | 0.889 | 0.596 | 0.823  | 0.724 | 0.826 | 0.917 |
| WSS-DL (40) | 0.875  | NA    | 0.939 | 0.96  | 0.866 | 0.73  | 0.872      | 0.94     | 0.911 | 0.909 | 0.564 | 0.894 | 0.73  | 0.836  | 0.757 | 0.835 | 0.92  |
| WSS-DL (60) | 0.884  | NA    | 0.966 | 0.97  | 0.893 | 0.782 | 0.883      | 0.956    | 0.915 | 0.931 | 0.595 | 0.906 | 0.822 | 0.863  | 0.813 | 0.849 | 0.933 |
| WSS-DL (80) | 0.907  | NA    | NA    | 0.974 | 0.918 | 0.823 | 0.889      | 0.965    | 0.918 | 0.955 | 0.615 | 0.923 | 0.88  | 0.899  | 0.873 | 0.862 | 0.947 |
| ICD         | 0.849  | 0.695 | 0.947 | 0.946 | 0.905 | 0.722 | 0.848      | 0.922    | 0.898 | 0.919 | 0.604 | 0.847 | 0.556 | 0.786  | 0.625 | 0.817 | 0.908 |
| Silver std. | 0.926  | 0.866 | 0.952 | 0.788 | 0.926 | 0.695 | 0.882      | 0.898    | 0.914 | 0.889 | 0.528 | 0.858 | 0.844 | 0.723  | 0.573 | 0.805 | 0.9   |
| PheCAP (20) | 0.86   | 0.597 | 0.894 | 0.882 | 0.891 | 0.657 | 0.799      | 0.907    | 0.905 | 0.889 | 0.379 | 0.822 | 0.542 | 0.776  | 0.798 | 0.816 | 0.878 |
| PheCAP (40) | 0.889  | NA    | 0.905 | 0.908 | 0.91  | 0.705 | 0.826      | 0.922    | 0.909 | 0.907 | 0.383 | 0.844 | 0.555 | 0.797  | 0.85  | 0.836 | 0.896 |
| PheCAP (60) | 0.906  | NA    | 0.92  | 0.939 | 0.916 | 0.718 | 0.837      | 0.928    | 0.911 | 0.911 | 0.389 | 0.857 | 0.561 | 0.798  | 0.869 | 0.855 | 0.906 |
| PheCAP (80) | 0.908  | NA    | NA    | 0.952 | 0.919 | 0.725 | 0.842      | 0.933    | 0.914 | 0.911 | 0.392 | 0.871 | 0.562 | 0.803  | 0.884 | 0.87  | 0.91  |
| Xpress      | 0.917  | 0.711 | 0.957 | 0.96  | 0.935 | 0.69  | 0.883      | 0.93     | 0.917 | 0.86  | 0.566 | 0.878 | 0.575 | 0.674  | 0.659 | 0.888 | 0.92  |
| DAPS (20)   | 0.783  | 0.634 | 0.826 | 0.663 | 0.745 | 0.533 | 0.745      | 0.853    | 0.881 | 0.764 | 0.406 | 0.591 | 0.44  | 0.671  | 0.43  | 0.611 | 0.667 |
| DAPS (40)   | 0.793  | NA    | 0.827 | 0.675 | 0.746 | 0.526 | 0.742      | 0.862    | 0.881 | 0.774 | 0.413 | 0.597 | 0.449 | 0.669  | 0.435 | 0.627 | 0.667 |
| DAPS (60)   | 0.798  | NA    | 0.826 | 0.679 | 0.745 | 0.527 | 0.741      | 0.865    | 0.88  | 0.778 | 0.418 | 0.59  | 0.451 | 0.669  | 0.445 | 0.636 | 0.666 |
| DAPS (80)   | 0.798  | NA    | NA    | 0.676 | 0.741 | 0.522 | 0.74       | 0.866    | 0.881 | 0.785 | 0.416 | 0.587 | 0.448 | 0.673  | 0.444 | 0.644 | 0.666 |
| NN (20)     | 0.839  | 0.846 | 0.924 | 0.918 | 0.841 | 0.708 | 0.869      | 0.911    | 0.898 | 0.807 | 0.521 | 0.802 | 0.574 | 0.733  | 0.652 | 0.804 | 0.815 |
| NN (40)     | 0.864  | NA    | 0.954 | 0.924 | 0.866 | 0.735 | 0.872      | 0.929    | 0.905 | 0.861 | 0.566 | 0.84  | 0.688 | 0.78   | 0.739 | 0.826 | 0.851 |
| NN (60)     | 0.88   | NA    | 0.971 | 0.933 | 0.893 | 0.786 | 0.879      | 0.951    | 0.906 | 0.907 | 0.6   | 0.867 | 0.809 | 0.828  | 0.802 | 0.839 | 0.89  |
| NN (80)     | 0.902  | NA    | NA    | 0.948 | 0.918 | 0.831 | 0.89       | 0.966    | 0.913 | 0.953 | 0.617 | 0.898 | 0.9   | 0.875  | 0.87  | 0.855 | 0.924 |

**Table 4.** F-scores of disease status prediction - WSS-DL (n = 20, 40,60,80), PheCAP, WSS-DL (n = 20, 40,60,80), silver standard labels, raw ICD-9 codes, DAPS (n = 20, 40,60,80), and NN (n = 20, 40,60,80)
